# Supplementary material for: Synthesis of New Homopiperazine-1.4-Diium Tetrachloridromercurate (II) Monohydrate (C5H14N2)[HgCl4]·H2O, Crystal Structure, Hirshfeld Surface, Spectroscopy, Thermal Analysis, Antioxidant Activity, Electric and Dielectric Behavior
Source: MDPI journal article supplement (doi:10.3390/cryst12040486), 2022-03-31
Supplement: s1 [file s1]

## Supplementary materials

# Synthesis of New Homopiperazine-1,4-Diium Tetrachloridromercurate (II) Monohydrate (C<sub>5</sub>H<sub>14</sub>N<sub>2</sub>)[HgCl<sub>4</sub>]·H<sub>2</sub>O, Crystal Structure, Hirshfeld Surface, Spectroscopy, Thermal Analysis, Antioxidant Activity, Electric and Dielectric Behavior

Chaima Ayari <sup>1</sup>, Abdullah A. Alotaibi <sup>2,\*</sup>, Mohammed A. Baashen <sup>2</sup>, Khalid M. Alotaibi <sup>3</sup>, Khadijah H. Alharbi <sup>4</sup>,  
Abdelhak Othmani <sup>5</sup>, Wataru Fugita <sup>6</sup>, Cherif Ben Nasr <sup>1</sup> and Mohamed Habib Mrad <sup>1,2</sup>

<sup>1</sup> Materials Chemistry Laboratory, Faculty of Sciences of Bizerte, University of Carthage, Zarzouna 7021, Tunisia; ayarichaima33@gmail.com (C.A.); cherif\_bennasr@yahoo.fr (C.B.N.); m.mrad@su.edu.sa (M.H.M.)

<sup>2</sup> Department of Chemistry, College of Sciences and Humanities, Shaqra University, Shaqra 11911, Saudi Arabia; mbaashen@su.edu.sa

<sup>3</sup> Department of Chemistry College of Science, King Saud University, Riyadh 11451, Saudi Arabia; khalid.m@ksu.edu.sa

<sup>4</sup> Department of Chemistry, College of Sciences & Arts, King Abdulaziz University, Rabigh 21589, Saudi Arabia; khalharbe@kau.edu.sa

<sup>5</sup> Laboratory of Material Physics: Structures and Properties, LR01 ES15, Faculty of Sciences, University of Carthage, Zarzouna 7021, Tunisia; othmaniabdelhak1687@gmail.com

<sup>6</sup> Department of Marine Electronics and Mechanical Engineering, Faculty of Marine Engineering, Tokyo University of Marine Science and Technology, Tokyo 135-8533, Japan; fujitaw@st.seikei.ac.jp

\* Correspondence: aalotaibi@su.edu.sa

**Table S1.** The different H-Bonds present in (C<sub>5</sub>H<sub>14</sub>N<sub>2</sub>)[HgCl<sub>4</sub>]·H<sub>2</sub>O.

| D—H...A                     | D—H (Å) | H...A (Å) | D...A (Å) | D—H...A (°) |
|-----------------------------|---------|-----------|-----------|-------------|
| C1—H1C...Cl3 <sup>i</sup>   | 0.97    | 2.92      | 3.558 (6) | 124         |
| C1—H1D...Cl3 <sup>ii</sup>  | 0.97    | 2.85      | 3.484 (7) | 124         |
| C2—H2D...Cl3 <sup>iii</sup> | 0.97    | 2.89      | 3.606 (7) | 132         |
| C3—H3A...Cl4                | 0.97    | 2.85      | 3.802 (7) | 168         |
| C3—H3B...Cl2 <sup>v</sup>   | 0.97    | 2.75      | 3.510 (7) | 136         |
| C5—H5A...Cl2 <sup>v</sup>   | 0.97    | 2.85      | 3.505 (7) | 126         |
| C5—H5B...Cl1 <sup>v</sup>   | 0.97    | 2.9       | 3.807 (7) | 156         |
| N1—H1A...O1 <sup>vi</sup>   | 0.89    | 1.86      | 2.744 (7) | 171         |
| N1—H1B...Cl1 <sup>iii</sup> | 0.89    | 2.8       | 3.348 (5) | 121         |
| N1—H1B...Cl4 <sup>vi</sup>  | 0.89    | 2.55      | 3.216 (5) | 133         |
| N2—H2A...Cl1                | 0.89    | 2.44      | 3.223 (6) | 147         |
| N2—H2B...Cl2 <sup>ii</sup>  | 0.89    | 2.3       | 3.104 (5) | 149         |
| N2—H2B...Cl3 <sup>i</sup>   | 0.89    | 2.95      | 3.424 (6) | 115         |
| O1—H1P...Cl2                | 0.8     | 2.46      | 3.209 (5) | 156         |
| O1—H1O...Cl1                | 0.8     | 2.54      | 3.309 (5) | 162         |

Symmetry codes: (i)  $-x, y+1/2, -z+1/2$ ; (ii)  $-x+1, y+1/2, -z+1/2$ ; (iii)  $x, -y+3/2, z+1/2$ ; (iv)  $-x, -y+1, -z+1$ ; (v)  $x-1, y, z$ ; (vi)  $x-1, -y+3/2, z+1/2$ ; (vii)  $-x+1, -y+1, -z+1$ .

**Table S2.** The different distances and angles of every part in (C<sub>5</sub>H<sub>14</sub>N<sub>2</sub>)[HgCl<sub>4</sub>]·H<sub>2</sub>O.

| Distances (Å)                      |           | Angles (°)  |            |
|------------------------------------|-----------|-------------|------------|
| [HgCl <sub>4</sub> ] <sup>2-</sup> |           |             |            |
| Hg1—Cl1                            | 2.582 (2) | Cl4—Hg1—Cl3 | 137.77 (7) |
| Hg1—Cl2                            | 2.654 (2) | Cl4—Hg1—Cl1 | 106.74 (6) |

|                                                                |             |             |            |
|----------------------------------------------------------------|-------------|-------------|------------|
| Hg1—Cl3                                                        | 2.4135 (19) | Cl3—Hg1—Cl1 | 105.51 (5) |
| Hg1—Cl4                                                        | 2.401 (2)   | Cl4—Hg1—Cl2 | 96.65 (5)  |
|                                                                |             | Cl3—Hg1—Cl2 | 105.58 (5) |
|                                                                |             | Cl1—Hg1—Cl2 | 97.23 (5)  |
| <b>(C<sub>5</sub>H<sub>14</sub>N<sub>2</sub>)<sup>2+</sup></b> |             |             |            |
| C1—N2                                                          | 1.473 (7)   | N2—C1—C2    | 113.7 (5)  |
| C1—C2                                                          | 1.518 (8)   | N1—C2—C1    | 113.1 (5)  |
| C2—N1                                                          | 1.481 (7)   | C4—C3—N1    | 112.8 (5)  |
| C3—C4                                                          | 1.514 (8)   | C3—C4—C5    | 116.5 (6)  |
| C3—N1                                                          | 1.519 (8)   | N2—C5—C4    | 115.7 (5)  |
| C4—C5                                                          | 1.515 (9)   | C2—N1—C3    | 115.6 (5)  |
| C5—N2                                                          | 1.502 (8)   | C1—N2—C5    | 119.7 (5)  |
| <b>H<sub>2</sub>O</b>                                          |             |             |            |
| O1—H1P                                                         | 0.7999      | H1P—O1—H1O  | 104.9      |
| O1—H1O                                                         | 0.8016      |             |            |

**Table S3.** The main bands detected in the infrared spectrum of (C<sub>5</sub>H<sub>14</sub>N<sub>2</sub>)[HgCl<sub>4</sub>]·H<sub>2</sub>O: Wave-numbers values and their modes of vibration.

| Detected | Assignment              | Detected | Assignment            |
|----------|-------------------------|----------|-----------------------|
| 3522     | v (O-H)                 | 1225     | v <sub>as</sub> (C-N) |
| 3433     |                         | 1125     |                       |
| 3127     | v <sub>as</sub> (N-H)   | 1068     | v <sub>as</sub> (C-C) |
| 3012     | v <sub>s</sub> (N-H)    |          |                       |
| 2840     | v <sub>s</sub> (C-H)    | 979      | ρ(NH <sub>2</sub> )   |
| 2776     | v <sub>as</sub> (C-H)   |          |                       |
| 1625     | δ (NH <sub>2</sub> )    | 883      | δ (C-C-C)             |
|          | δ (H <sub>2</sub> O)    | 829      | δ (C-C-N)             |
| 1572     | δ <sub>as</sub> (C-N-H) | 531      | δ (C-N-C)             |
| 1456     | δ (CH <sub>2</sub> )    |          |                       |

v: Stretching; δ: Bending; ρ: Rocking; as: asymmetric; s: symmetric.
